# Supplementary material
Source: Research Square preprint supplement (doi:10.21203/rs.3.rs-9290918/v1)
Supplement: Supplementary file 1 [file e0f07c71598512af2494f3fa.docx]

**Table 2. Characteristics and course of disease in individual patients**

JAKi=janus kinase inhibitor; med=medication; BL=baseline; CS=corticosteroids (drops per day; equivalent of prednisolone acetate 1% formulation); FU=follow-up; Tofa=tofacitinib; d=day; w=?week; Pred=prednisolone; Ada=adalimumab; Toci=tocilizumab; Gol=golimumab; Cer=certolizumab; LFN=leflunomide; OD=right eye; OS=left eye; OU=both eyes; Inf=infliximab; CsA=ciclosporine A; Aza=azathioprine; Eta=etanercept; Aba=abatacept; Bari=baricitinib; Upa=upadacitinib; n.a.=not applicable

* in addition to JAKi preparation
